# Supplementary material for: A Sensitive Aptamer Fluorescence Anisotropy Sensor for Cd2+ Using Affinity-Enhanced Aptamers with Phosphorothioate Modification
Source: MDPI journal article supplement (doi:10.3390/bios12100887), 2022-10-17
Supplement: s1 [file s1]

*Supporting Information*

# **A Sensitive Aptamer Fluorescence Anisotropy Sensor for Cd<sup>2+</sup> Using Affinity-Enhanced Aptamers with Phosphorothioate Modification**

**Hao Yu <sup>1,2</sup> and Qiang Zhao <sup>1,2,3,\*</sup>**

<sup>1</sup> State Key Laboratory of Environmental Chemistry and Ecotoxicology, Research Center for Eco-Environmental Sciences, Chinese Academy of Sciences, Beijing 100085, China

<sup>2</sup> University of Chinese Academy of Sciences, Beijing 100049, China

<sup>3</sup> School of Environment, Hangzhou Institute for Advanced Study, University of Chinese Academy of Sciences, Hangzhou 310000, China

\* Correspondence: qiangzhao@rcees.ac.cn

**Table S1.** List of the anti-Cd<sup>2+</sup> aptamer sequences with PS modification at different labeling sites.

| Name       | Sequences                                |
|------------|------------------------------------------|
| CBA15-C1S  | 5'-C <sub>PS</sub> GG GTT CAC AGT CCG-3' |
| CBA15-G2S  | 5'-CG <sub>PS</sub> G GTT CAC AGT CCG-3' |
| CBA15-G3S  | 5'-CGG <sub>PS</sub> GTT CAC AGT CCG-3'  |
| CBA15-G4S  | 5'-CGG G <sub>PS</sub> TT CAC AGT CCG-3' |
| CBA15-T5S  | 5'-CGG GT <sub>PS</sub> T CAC AGT CCG-3' |
| CBA15-T6S  | 5'-CGG GTT <sub>PS</sub> CAC AGT CCG-3'  |
| CBA15-C7S  | 5'-CGG GTT C <sub>PS</sub> AC AGT CCG-3' |
| CBA15-A8S  | 5'-CGG GTT CA <sub>PS</sub> C AGT CCG-3' |
| CBA15-C9S  | 5'-CGG GTT CAC <sub>PS</sub> AGT CCG-3'  |
| CBA15-A10S | 5'-CGG GTT CAC A <sub>PS</sub> GT CCG-3' |
| CBA15-G11S | 5'-CGG GTT CAC AG <sub>PS</sub> T CCG-3' |
| CBA15-T12S | 5'-CGG GTT CAC AGT <sub>PS</sub> CCG-3'  |
| CBA15-C13S | 5'-CGG GTT CAC AGT C <sub>PS</sub> CG-3' |
| CBA15-C14S | 5'-CGG GTT CAC AGT CC <sub>PS</sub> G-3' |

**Table S2.** Binding affinity of PS modified aptamers and unlabeled aptamer characterized by ITC.

| Aptamer    | K <sub>d</sub> /nM | $\Delta H$ (kJ/mol) | $-T\Delta S$ (kJ/mol) |
|------------|--------------------|---------------------|-----------------------|
| CBA15      | 216 ± 43.3         | -71.6 ± 1.67        | 33.5                  |
| CBA15-C1S  | 148 ± 13.7         | -70.6 ± 0.7         | 31.6                  |
| CBA15-G2S  | 176 ± 19.7         | -70.6 ± 0.9         | 32.0                  |
| CBA15-G3S  | 46.6 ± 12.7        | -75.0 ± 1.5         | 33.1                  |
| CBA15-G4S  | 389 ± 22.9         | -79.2 ± 0.7         | 42.6                  |
| CBA15-T5S  | 169 ± 29.3         | -74.9 ± 1.5         | 36.2                  |
| CBA15-T6S  | 261 ± 35.5         | -70.5 ± 1.2         | 32.8                  |
| CBA15-C7S  | 368 ± 38.0         | -59.3 ± 0.9         | 22.5                  |
| CBA15-A8S  | 182 ± 28.1         | -74.3 ± 1.3         | 35.8                  |
| CBA15-C9S  | 268 ± 25.8         | -80.1 ± 1.0         | 42.6                  |
| CBA15-A10S | 105 ± 11.5         | -75.2 ± 0.8         | 35.3                  |
| CBA15-G11S | 177 ± 50.4         | -72.0 ± 2.3         | 33.4                  |
| CBA15-T12S | 360 ± 63.2         | -85.9 ± 2.1         | 49.1                  |
| CBA15-C13S | 266 ± 26.9         | -79.5 ± 1.1         | 41.9                  |
| CBA15-C14S | 200 ± 57.9         | -67.2 ± 2.4         | 29.0                  |

**Table S3.** Comparison of some aptamer based methods for Cd<sup>2+</sup> detection.

| Methods                                                                                | Detection Limit (nM) | Detection Range (nM)         | Application                                                    | Ref.      |
|----------------------------------------------------------------------------------------|----------------------|------------------------------|----------------------------------------------------------------|-----------|
| Aptamer fluorescence assay based on conformational switching of SYBR green I and probe | 3.0                  | 10.0 – 2000                  | River, pond water, tap water and mine pit water                | 32        |
| A fluorescence quenching sensor                                                        | 2.2                  | 7.2 – 5000                   | River, pond water, mine pit water, tap water and blood samples | 33        |
| A light-up fluorescence biosensor                                                      | 40.0                 | 0 – 1000                     | Lake water                                                     | 15        |
| Aptamer colorimetric assay using cationic polymer and gold nanoparticles               | 4.6                  | 10.0 – 4000                  | Not mentioned                                                  | 16        |
| Fluorescence assay using MOPS to amplify signal                                        | 17.1                 | 44.5 – 3.6 × 10 <sup>4</sup> | River and ultrapure water                                      | 20        |
| A phosphorescence resonance energy transfer aptasensor                                 | 3.1                  | 4.4 – 444.8                  | Bottle water and yesso scallops                                | 34        |
| A ratiometric electrochemical sensor                                                   | 6.2                  | 17.8 – 7116.8                | Real mussel samples                                            | 18        |
| Colorimetric assay using G-quadruplex three-way junction                               | 0.01                 | 0.01 – 1000                  | River water samples                                            | 35        |
| FA sensor using TMR labeled aptamer                                                    | 6.1                  | 6.1 – 6250                   | Lake water and tap water                                       | This work |

MOPS: 3-(N-morpholino)propane sulfonic acid.

**Table S4.** Detection of Cd<sup>2+</sup> spiked in complex sample matrix.

| Complex samples                 | Cd <sup>2+</sup> Spiked (nM) | Cd <sup>2+</sup> Found (nM) | Recoveries (%) |
|---------------------------------|------------------------------|-----------------------------|----------------|
| Lake water<br>(20-fold diluted) | 24                           | 29.1 ± 2.1                  | 121.3 ± 8.7    |
|                                 | 49                           | 48.9 ± 4.9                  | 99.7 ± 10.0    |
|                                 | 98                           | 107.6 ± 9.5                 | 109.8 ± 10.0   |
|                                 | 391                          | 378.1 ± 16.2                | 96.7 ± 4.1     |
|                                 | 781                          | 695.6 ± 62.5                | 89.1 ± 8.0     |
| Tap water<br>(20-fold diluted)  | 24                           | 30.5 ± 4.7                  | 127.1 ± 19.5   |
|                                 | 49                           | 52.8 ± 3.5                  | 107.7 ± 7.2    |
|                                 | 98                           | 100.9 ± 3.5                 | 103.0 ± 3.6    |
|                                 | 391                          | 358.7 ± 15.0                | 91.8 ± 3.8     |
|                                 | 781                          | 638.4 ± 41.6                | 81.7 ± 5.3     |

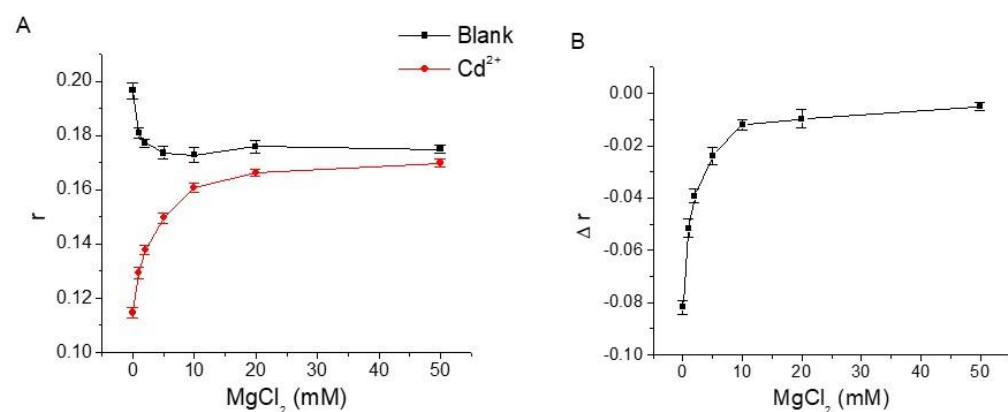

**Figure S1.** (A) Effect of MgCl<sub>2</sub> concentration on FA responses of CBA15-G3S-T12-TMR (20 nM) in the absence or in the presence of Cd<sup>2+</sup> (1000 nM). (B) The relationship between FA changes ( $\Delta r$ ) and MgCl<sub>2</sub> concentration. The binding buffer contained 20 mM Tris-HCl (pH 7.5), 20 mM NaCl and varying concentrations of MgCl<sub>2</sub>.

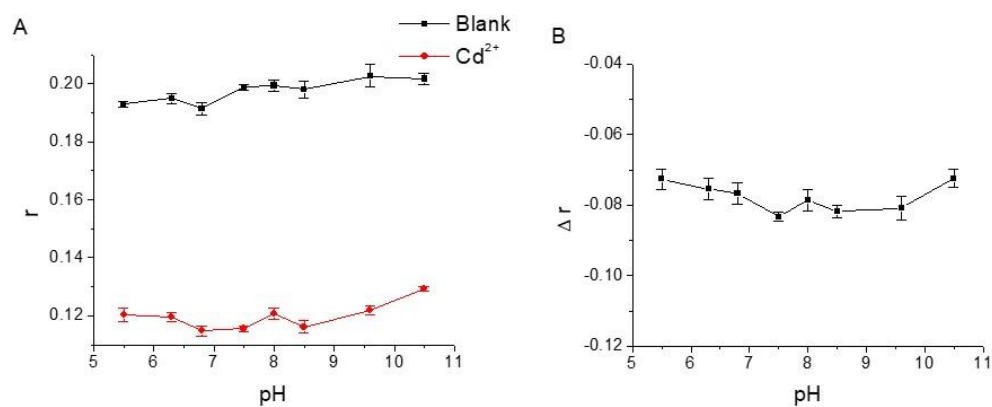

**Figure S2.** (A) Effect of pH of binding buffer (5.5, 6.3, 6.8, 7.5, 8.0, 8.5, 9.6 and 10.5) on FA responses of CBA15-G3S-T12-TMR (20 nM) in the absence or in the presence of Cd<sup>2+</sup> (1000 nM). (B) The FA changes ( $\Delta r$ ) caused by Cd<sup>2+</sup> at various pH of the binding buffer. The binding buffer contained 20 mM Tris-HCl and 20 mM NaCl.

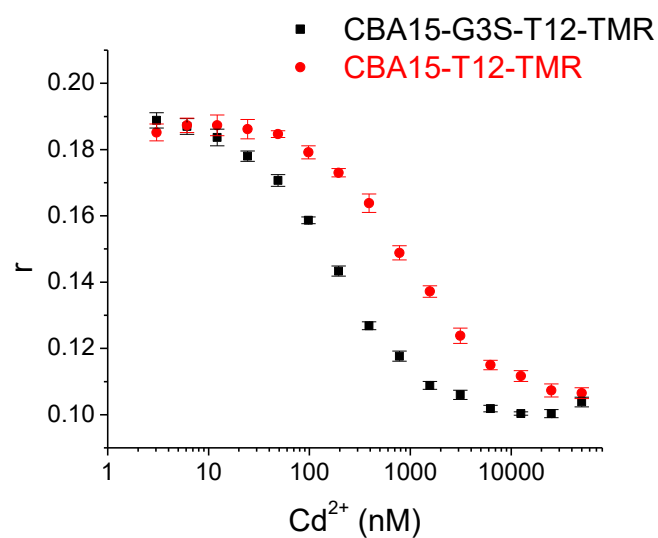

**Figure S3.** Comparison of FA detection  $\text{Cd}^{2+}$  with CBA15-G3S-T12-TMR and CBA15-T12-TMR.

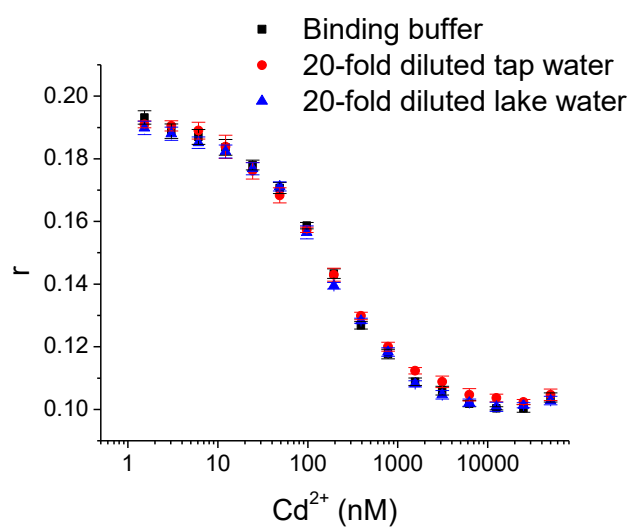

**Figure S4.** Detection of  $\text{Cd}^{2+}$  in the binding buffer, 20-fold diluted tap water or 20-fold diluted lake water with the aptamer FA sensor by using CBA15-G3S-T12-TMR.
